# Supplementary material for: Characterization of the OmyY1 Region on the Rainbow Trout Y Chromosome
Source: Int J Genomics. 2013 Mar 11;2013:261730. doi: 10.1155/2013/261730 (PMC3647546; doi:10.1155/2013/261730)
Supplement: Supplementary file 1 — List of salmonid 4x44K oligo microarray hits from CGH analysis that share homology with the sequence from the OmyY1 region. This list includes single copy genes, paralogs to OmyY1 linked sequence, rDNA, transposon-related transcripts, and other repetitive elements. [file 261730.f1.xlsx]

## Sheet: Sheet1
44K array designation	Gene name	Miller scaffold	Miller scaffold homology	Omy contig	Omy contig homology	Notes	ESTseq
C262R066	F-Box/WD repeat containing protein 2	MMSRT112A/121C	0.97	Contig_2	0.97		tcgggTCACCAAGGTGATTCTTCAGAAGAGTGAAGTAGAATCCATGGTGCACTGTCCTGGTGACTACATTCTGTTGAGTGCTGACAAATATGAAATAAAGGTTTGGCCTATAGGCAGGGAAATCAACTGCAAGTGCTTGAAGACCTTGTCCGTGTCAGAGGACCGTAGTGTGTGTCTGCAGCCTCGCCTGCAGTTTGACGGCCGCTATGTCGTTTGTAGCTCGGACCTGGGGGTCTACCAGTGGGACTTTGCCAGCTTCGATATCCTCAGGGTCATCAAAACGCAGGACCCCGCCAACCTTTCCCTGCTCAGCTTCGGCGAGGTGTTCTCGCTCCTCTTCGACACCGACTTCCTGTATGTCATGGACCTGAGGACAGAAAAGATAACGGGTCGTTGGCC…
C179R024	F-Box/WD repeat containing protein 2	MMSRT112A/121C		Contig_2	0.99		CCAGGACAGTGCACCATGGATTCTACTTCACTCTTCTGAAGAATCACCTTGGTGACCCACTCAGTATGTCCCGTGAGGGTGTTGAGGCAGGCGCCTGCCGACAGGGACCACACCTTCACAGAGAAGTCGGCCGAGCCGCTCACCAGCGTGTCCAGGTCATCCTTGTAGTCCACGCTGAACACTGCACCCGTGTGCCCACGGAACTGCTGGATCTTGGCACCTGTGCTCCACTCCCAGCAGGCGATAGTGTTGTCAAAGGACCCAGTCACCAGCTTCTGCTCATCAAACTTCACTGTGGCACAGGTGTGTGTCTGAATGCCGTAGATGCACTGCCCGGTGCGGACGTCCCACAGTTTGGCAGAAAGGTCATCAGAGCCTGTGCAGAGAAGGCCGTCCTTG…
C264R086	cAMP-responsive element-binding protein 3-like protein 4	MMSRT014G/069D	96%, 92%	Contig_121	0.96		aatgattgacatgagaattgccagctggatttttgtGAGAAATGCGTCTTACACTGGTTGATCTTTAAACACTACTCGTCTGCATTTTTCTCCTCACGTTGGGCCTACTATTGTTGTAATGCTCTTGAAGTAGACCTATATATATATTCGGAAGAATCATCGCTTCTGAAAACCGCAGCAGACAAGACATGGATATAGAGAATGGAGAGCTGTTTTTCGGACACAAGGAGGACAGTATGTCAGAGGAGAGTTGGGGACTGGAAGGGCCATTTTCTTGCTCTGATGTTATCTATGCTGGCTCTGAAAAACCCCTCGATGAATGCACGGTAGACCCCCAAAGTGGTCTAAACAACAGCGAGCCAGAGGATGTGCTTTATGCCATCAATCCAAATGACGTCT…
C117R024	CREB-regulated transcription coactivator 2	MMSRT069D	0.92	Contig_107	0.94		CGCCGGGGCACAACGTCCCTAACATCATCCTCACAGGAGACAGTTCATTGGGCCTCTCCAAAGAGATCGCCAGCGCCCTGTCCCACGTGCCAGGGTTTGAGATGGATTCCTTTACCCTGGATGACCCCCTCAGGATGGACCCCCTGGCCCTTGAGGGGCTGGGCATGCTGGACGGGGACCTCATGCTGACTGACCCTGCCGTGGAAGATTCCTTCCGCTCCGACCGCCTCAAGTGACCCCCCCCCCCAGGAGTGGATACGGAGGAGTGAGGAGGGAAGGGGGTTGGAAAGACCCCAGACTGAAGTGGAACAGGTGGGGATGAGCCCTGCTTTGTTTCCCCCTCCTTGGCGATTGACCCAACCACAGCATCTGCGAAAAAAGGTCAGGTGGGAGGTTTTG…
C173R028	Transcription elongation factor SPT6 (A)	MMSRT055A	1	n/a	n/a		TCGTGTTGCAGGAGGCTGTATAACTGGCTGAAGGTGGCTCCCTACAGACCAGACCAGCAGCAGGCGGAGGAGGAGGATGATGATCTGATGGATGAGAGTCAAGGAAAAGGCATCAGAGTCCTGGGAGTGGCCTTTGCAGACAGCAGAGACACGCCAGTGTTCTGTTCTCTGATCAACGGCGAGGGAGAGGTGGTGGACTTCCTCCGTCTGCCTTACTTCCTGAAGAGGAGGAATGCATGGAGGGAGGACGAGAGGGACAAAAAGCTCCAGGACATTGAGAACCTAAAGAAGTTCCTGATCAGTAAGAAACCTCACGTGGTGGCTGTTGCTGGGGAGAATAGAGATGCCCACATGATAATGGAGGACATTAAGAGGACAGTGAGTGAGTTGGAGCAGGAG…
C041R043	Transcription elongation factor SPT6 (B)	MMSRT055A	0.93	n/a	n/a		CCCAGCAGCCGATGGCGACGCCCATGATGACCCCCAGCTACTCGTACACCACCCCCAGCCAGCAGACCATGGGTACGCCCCAGTACCCCTCCTCCACCCCCTTGTCCTCCCACGGACACACACAGAGCAGCCAAGGGCACGCCCACCAGGGCCACAGCAGCAGCAACAGTCACCATGGACACTCGTCCAACACACCTTCCTCCTCCACCTCTTCCAGAGGACGCACGCCGCAGCAGCCTAAGTCGAGCGGCAGCACGGCGGTGGACTGGGCCAAGATGGCGGAGCAGTGGCTCCAGGACAAGGAGGCGGAGAGGAAGAAGCAGAAGACCCCCAGGATGACCCCACGGCCTTCCCCCAGCCCCATGATCGAGAGCACCCCAATGTCCATCGCTGGAGACG…
C034R098	Unknown(665bp)	MMSRT055A	0.92	n/a	n/a		aTCAtttAcattGCGGtcGGGCATCAGAATTATACTTGTTTTGTATGTTTTTTTTTGTATCTTTTTCTCAAACAATAACAACCATGCATAAACAAAAGACAAACAGACACATTTCATCAAACATAAATGGCATCACACCTACTCAGGCCCACGTGTTCCCACCGCAAACACACGCATCACGTATGTCTCAACCACACTCTCCTTCATCCCCTGGAACATTCCAGTGCTTGTAGCACTCTGCCATATGGCCTCAAATTGCACTCTTCTATTTTTATCCGTAGCCCACACCTTTTGAATATTTACATAATACATTTGATTCATCCACTGTCATAGTGATGGAGGATAATTTGATTTCCAGTTTTTGAGGAGAAGTTTTTTTCAAAATCATTGACGAGAAAA…
C050R150	Unknown(641bp)	MMSRT055A	0.89	n/a	n/a		ACATTGTTTGCAAACTGATGTGTGACATATTAATGCCAAAATAACAGACAAAACAGACAACCCCCCCCAAAATGTTTTGGTAAAAATGTGGGGCTCCCCTACCTGCCCTGAATGACAGGTCGCCACTGTACAAACAGAAGCAAATAAATGTGTGTGTGTGTGTTGAACAACACTGTGTGTACATAACATACACACACACACACTGGGGGGAGGGACTCCCAGTGTTAATACAAATACTTTATTAAAGGGTTTGAAAAGGTAGAAAAGGTTATCAGCAGTGTAATTAATACCAGAGACAAAATACCTCCTTTCTCTCCTCCCACTGTCAACAACCACAGGCTTACTGATGGTACAGCAACTAATATTGCAAATAAACATGGGACCAGTTTCCCAGCCCTA…
C084R048	Nuclear import protein mog1	MMSRT055A	0.96	n/a	n/a		CCTTCGTGTTGTGTTTTTGTGTTGTCTTAAGTGCTTACAAAAACAAAGTTCCTCCAGAATGCAGAACGCCACAGTGGGTCGTCCTCTATTTGGAGGAGCCCTGTCAGCCACCATCCCTCACAGTGCCAAAGACATCAGTGAATTGAGGGAGATTCCAGACAACCAGGAGGTTTTTGCCCACGACCACAGTGACCAGAGCATCATCGTTGAACTACTAGAGTTACAAAACCATGTCCAGAATGAAGACGCTGCCAGGTACCACTTTGAGGATGTAGCAGGGAGCAACAAGGCATCGGCCCCAGGGACATCAGAGGTCAGGACTGTGGTGGCCTTGCCCAAGTCAGACCTCTCCCTGGAGGAGTGCAGCTCTGCCTTTCTGCTCACTGGAACACAGTGTGT…
C114R089	Solute carrier family 25 member 35	MMSRT055A	0.97	n/a	n/a		aacatggcaaggacACAGTTTAAAGGACAGACGAGAGGAAGGAATACTGAGTAGAAATAACCACAATGGAACATACAAACTATTTTTAGGGCGCGACCGATTGTTTATTATCGTCCCGCAGTAGTCTGTGACCTTGGGATTTTGACAGATTTAGCTTAGAACCGGCGATTTGGAATTCTACATATCCTTCATATACCGAATTTCATTTAGCTAAGGTCGAGCCCATTTAGCGATGGATTTTATATTGAGCGGGGCAGCTGCCTGCGGAGCTTGCCTGTTCACTAACCCGCTGGAGGTTGTCAAAACTCGGATGCAATTACAAGGCGAGCTCAAAAGCCGGGGGACCTACCAGATTTACTACCGCAACGTTTTCCACGCTTTTTACACTATCGGCAAAGT…
C202R064	Unknown(751bp)	MMSRT112A	0.96	Contig_2	0.96	420 to 575bp region absent on blastn and blastx	GAGAATACAAGTTTTTATAAGACTGGGTAAAGCACCAGCGAAAACAATGACATGGTTAGTTTCTTACAACATTTCTCCTACCCAACATATCTCCATGACTTGTTTTGATCACAGAATTAGATATATATATAAAATTAAATGTGTTCAAGCTGTACTCAGGGGTAAACATAACATAGTAAAAGTAAATTCACTCACTCAATTTAGTATGATGCTGCATTTCCTATGGTATTATTGATTTGTTGATGTCCATCATCCATTTCATGTTACGAATTACGATTTGTACAATATGTTATGAATTTGCAATACGTATGATATGTGACCAATTCCAATTGGTTACGGCTAACGTTAGCTAGATTGCTAGGTGGCTAATGTTAGCAAGGTCAGGAGTTAGGTTAAAGG…
C111R146	Unknown(1636)	none of interest	0.99	Contig_28	0.99		attactccaatctgtcctactgaaaaacgaattgtcccggtggatatattatcgaatagatatttgaaaaacatcttgagGATTGATTATAAACAACGTTTGCCATGTTTCTGTCGATATTATGGAGCTAATTTGTAATATTTTTCGGTGTTTTCAGTGACCGCAATTGCCGGGCGATTTCTCAGCCAAACGTGAAGAAAACACGGGAGCTATTTCTCCTACAAAAATAATATTTTTGGAAAAAAGGAACATTTTCTATCTAACTGGGAGTCTCCTTACTGAAAACATCCGAAGCTCATCAAAGGATCGGGAACCAGTGTGTCCAGTGCGCGGGCTCGCTATAGGTGAGCCCACAACGGTTTGGCGCAACGTGGCCCATCCTGCTCTCCTGAATCGGCA…
C053R110	Zinc transporter ZIP1	MMSRT069D	0.9408	Contig_108, Contig_110	0.993		ACAGAGTGCAGTTTTTTGGCATAGCAGTAATGTAATTTTGCTGCCTTTTTCCCACTTGTTATTAAGTCTGTGCCAATACAAGCTGCTCACCAAGGCTGTCCTTTTATGAGAGAATACGACAGAAGGTGGTCTACCCCTCCCCATTCGACTGTAAGCCAATGGAGGGCGTCTGAGAGCTACTCTTTGCTGTTTCACTCAAGAGTGAAAGAGAAGCAGGGAGTGCAGAGATGGCTCTCAGAAAAGGATCTTCTGTTGCCCTCTCCGGGTGGCCATCTGAAGTGCAGATGAACCCAGCTTATGTCCCTGGCCTGGAGGTAAAGCTGGGAGCACTGGTTGTTCTTTTCTCCATCACACTGGTCTGTGGCTTCGCCCCTTTGTGCTTAGTCAGGGGGGCAGGGA…
C014R029	Zinc transporter ZIP1	MMSRT069D	0.8056	Contig_108	0.98		aaattatttcagATTACTTTTAATCAGTAAACCAGGTACAGATAAACATGTAGCTGATATAAAAGTGAACATAAAAACAAGAGCAGCCATTTCAATTATTCAAACACAAGTTTTACAAGAGAATAGAGGACTAATTCAAAGCTCTCACCACATGGCAGTGAAATCAGGGCCTATATTTAGATCTCAATGTAAGGCTCTGACAAAGAGCAACCACTCCATTTATCTTTTTAAGCATTTAAAGTAGAAGCCAGCTGTATATGCTCTTATGTTTTTTTTAGGGGCTAGGCAGTCATACTACTGAACAAACAAATGTGTGTACAATTCAGGACACACCTAGTCAGATTTCACAGCCAACAAAACATTAGGTATGCTATAATATCAAACCAGGAGTTATATAAT…
C057R047	Unknown(1268bp)	MMSRT069D	0.94	Contig_135	0.89		gggggatggacctttagtagtagtagactgggatggaccttgagtcacccatcaccggtttttcATTCACCTCACATTTAGGCCAGTAGTGGGTTAAGGATTGTTGGCAGAGATCAAAGAACTTCAGAAGATCCACTTGAGTGGAAGGGTTTAAAGAGAGTAAGGTACTTCACTGTGGAGCACATACTTACCTACTAGATTCTTGTTTTCATGTACAGTACCTGTGAGGCCTTTCCCCCTCTTATTTTAACACTTTATTTGTTGTTCAGCTTTGTATATGAAAACAAATTAATTGCACAATGGACTTTTCATTTTCTTTCAATTTCATATGATGTTGCCACACTGTTAAATGCCTCTGTTACCGTCATATATTGTTTTTGTTCTTGCAGTGTTATGTAG…
C023R097	Uncharacterized protein F54H12.3	MMSRT112A/121C	0.91	Contig_2	0.91		gggggatatgatgtcggtatacacaaatatgttgtaaaaccctgcatgtatatccgcagggaatggggctaatttatcttTCATATACGTCCATTTATTGGGAACCATCCCCAACATGTAGGCTAAATTACCGGTGGTCTTTATACCCCTATCCGCAGCCCCTGGGATTTGTACACGTTTATGAATAGGGTTGTAGCTCAAGAGTATTTCCGTATTGTTCTGGGTTAGGAGTTCGTTCAACTCTGAGACGATCCTGTCGATGGTTCTATAGAACCCTTTTTTAATCTTTATAAGTTTCGCAGGTTCCGATATCCTTTTGCAATAAAAATCCCGGTCCTTATCCTTGATATTATACCAACTATGTGGGTATGTAATCTCGCTGAGACCTACTTCCCACGC…
C120R010/C129R084	Peroxisome proliferator-activated receptor delta	MMSRT121C (third on list)	0.95	Contig 28 highestof 6	0.95	repetitive	CAGATCTATGAGAATTTATTGTCCAGCGAGCAGGATCCATACGAGTTGCAGATGCTCTACTTCCATTACGCTACATACAAAAACTTCCACATCCAGGATCGCAATGCATCAATTGATTATCACAAGAAGGCAGCAGAAATACCAAATCCTAACAAATACGGTAAAAAGAGTTTCAACATCTTGAGGAAGATTGAACAACGGGGAAGAAATCGAAGATGTGCAGAAATCTTGGAATTTCTCGAAAACCTTTCTTCTCACAATGAATAAGAGCAAGGAGGAGAATTAACCAATCAAAGAGGTTAACCAAATTGAGGGTCCCATACTGTACATACAATGTATTTTATTTTTATGCTCTTTGGGCTCTTTAGACCAGGTTGCTGCTATGCAAATTGTGCCAAA…
C099R063	Inositol Monophosphatase	MMSRT092E/107C/059D/036A	0.99	Contig_28	0.99	1 half of EST is ribosomal	CTGGTCACAATGTGTCTTTTAATCCTCTACATCCGTCTACAAATGTGGGCACAAACAGGATGTGGACACAGTCAGTACAAAGGAGGACGCATGTCAGTACTAGGTATAAAACCTGGCTATAAGACTTAACATAAAGACATCATGAAAGCTCATTCATGATTTTAACAAGTAATAAAAAAATTATATAAAACTGTAGGCTTTAAGTAAGTACAGAACTATATTATGCAAGTGGATACACATTTAACAGCACATTTCAAATGAAAATGCAGTCCAGTAGGGTGCAACATTTAGTGGACATAGTTCTATCCGGACCCATCACACTCCTGGACAAGAGCCCCTTTTTCAGCTGCATTAAACCTTGAATTTACTTAGTTTTTACATTTCAGTCATTTAGCAGAT…
C146R138/C250R044	Unknown(7630bp)	MMSRT092E/059D/103G	0.97	Contig_28	0.97	ribosomal	ggggTATGTCAGACAGTCATAATCAGTCATTTAATGTTAATGACAGGATATAATATGTCCCCAGGATTATGAAAAGAGAGACAACACTTTCCCAGGGGCAATGGAGAAAACGAACAGGGACCTTATCGATCTCATCGCTCAATTCCCACATCTACACCTGTGTGGTGGAGATGAGGAGATGGGCTGGATTGATCAAGAAATGGGAGTGACCTGCTGCCAAGAAGAGGAGCACAATGAGGAAATGGACTGGATCTCATCAAGCAATCCAAATTTCTGCGTCTGGAGAGAAAGAGAAGATGAAGATGATGAAGCCTAAACGGTGTCAACTGGATGGATTGTCATCAAAACATCTTTGCATTAAGGCCAGGAAATTGGTGCACAACGCAGCTGCATTTTGCA…
C234R042	Unknown(4037bp)	MMSRT103G/136F/092E/059D	0.99	Contig_28	0.99	ribosomal	gtttttcttctgaactggggccatgattaagagggacggccgggggcattcgtattgtgccgctagaggtgaaattcttgGACCGGCGCAAGACGGACGAAAGCGAAAGCATTTGCCAAGAATGTTTTCATTAATCAAGAACGAAAGTCGGAGGTTCGAAGACGATCAGATACCGTCGTAGTTCCGACCATAAACGATGCCAACTAGCGATCCGGCGGCGTTATTCCCATGACCCGCCGGGCAGCGTCCGGGAAACCAAAGTCTTTGGGTTCCGGGGGGAGTATGGTTGCAAAGCTGAAACTTAAAGGAATTGACGGAAGGGCACCACCAGGAGTGGAGCCTGCGGCTTAATTTGACAACACGGGAAACCTCACCCGGCCCGGACACGGAAAGGATTGA…
C205R054	Fructose-bisphosphate aldolase A	none of interest	89% highest	Contig_2	0.9	repetitive, transposon-related	gtcacttgacatttaacagtactagacatccttcattgccgatattgcaacagaacgcatcgcttccctctttaaaccgtAAAGTTACAGCTTTTGCTCTATTATCTTGTGCAGATAAACTGCTCTCGCTCTTGCTTTTGCTCTCTCTATCTCTCTCTCTCTCAGAGACACGATGCCTCACTCATTCCCATTCCTCTCTACGGAGCAGAAGAAGGAGCTCAGTGATATTGCTCAGAAGATCGTTGCTCCCGGCAAGGGAATCCTTGCTGCCGATGAGTCTACTGGCAGCGTCGCCAAGCGTTTCCAAAGCATCAACGCTGAGAACACTGAGGAGAACCGCCGTCTTTACCGCCAGCTCCTCTTCACGGCCGACCGCGTAGAGCCATGCATCGGTGGAGT…
C215R018	CREB-regulated transcription coactivator 2	MMSRT069D	0.95	Contig_107	0.94		CTCCTCCCTGAGTGGCCAGTCCCTCCACACCGCATCCAGTAACCCTAGTTACAATAGCGGGGTGGGAGGGTCCGGCTCGTGCTCCTCTTATTCGCCACTGCTAACTAGCCAGGGGCAGTCGCCTCTCAGCACGTTGCCACGGAGACGAGCTCAGCTCTCCCCTCTGATCCTACCCATGGGAGGGGAGTCTCGCCGACACCACTCCAAACAGTTCTCCCCCACCATCTCTCCTAACTTGTCCTCCATAACACAGGGTGTCCCTCTGGACACCAGCAAACTCCCCATGGACCAGAGGCTCCCTCCCTACCCCCTTCAGCCAACCCCAGCAGCAGCTTCATCAGCCAGGTCCTCCAGCATCCCATCAGCCCCAGCAGGCCTCTCAGGTAGGACAACAGCTCT…
C158R045	Unknown(898bp)	none of interest	0.93	Contig_2	0.94	repetitive	gggGCAGTAGATTGCAACACTGCCCCCTTTGACAGTCCATTCTTGTCTGAAAATGTTGTAGTTTGGGATGAAAATTTCAGAATTTTTGGTGGTCTTCCTAAGCCAGGATTCAGACACAGTTAAATCATTTGGGTTGGCAGAGTGTGCTAAAGCAGTGAATATAACAAACTTAGGGTGGAGGCTTCTAATGTTAACATGCATGAAACCAAGGCTATTACGGTTACAGAAGTCATCAAAAGAGAGCGCCTGGGGAATAGGAGTGGAGCTAGGCACTGCAGGGCCTGGATTCACCTCTACATCGCCAGAGGAACGGAGGAGGAGTAGGATAAGGGTACGGCTAAAAGTAATAAGAATTGGACGTCTGGAACAGAGAGTAAAAGGAGGTTTCTGGGGGTGATA…
C145R017	Unknown(2015bp)	scaffold of interest relatively low on list		Contig_2	0.95	repetitive	ATAAACAGTAGCTATAAAAAGTGAGTGAGTAGGCTGCATAGATTTCATGACTAGAAGCTCAAAAGACGAAAACGTCATTGTTGTTTTTTTTTTTTTGTAAATTGAAATTTGCTATCGTAAATGTTAGCAACACCTCCGCCTTTGCCGGATGCACGGGGGGTATGGTCACTAATGTAACCTGGGGGTGAGGCCTCATTTAACACAGTAAATTCATCAGGCTTAAGCCATGTTTCAGTCAGGCCAATCACATCAAGATTATTATCAGTGATTAGTTCATTGACTATAACTGCCTTGGAAGTGAGGGATCTAACATTAAGTAACCCAATTTTGAGATGTGAGGTATCACAATCTCTTTCAATAATGGCAGGAATGGAGGAGGTCTTTATACTAGTGAGATTG…
C129R097	Unknown(2739bp)	scaffold of interest relatively low on list		three with low scores	best is 83%	repetitive	cacaaacttggatagtaatacagaactctgcaggctatctttgcagtagattgcaacaccgccccctttggcagttctatCTTGGCGGAAAATGTTATAGTTAGCGATGGAGATTTCAGGGTTTTTGGTGGTTTTCCTAAGCCAGGATTTAGACACGGCTAAGACATCCGGGTTGGCAGAGTGTGCTAAAGCAGTGAGTAAAACAAACGTAGGGAGTAGGCTTTTAATGTTAACATGCATGAAACCAAGGCTTTTACGGTTACAGAAGTCAACAAATGAGAGCACCTGGGGAGTGGGAATGTAGCTAGGCACTGCAGGACCTGGATTAACCTCTACATCACCAGAGCAACAGAGGACAAGTAGGATAAGGGTCCTGTGCAGAGGGGAGAACAGGGATAC…
C042R109	Unknown(339bp)	scaffold of interest relatively low on list		Contig_28	0.82	ribosomal	AAAAGTTGTCAAAAAAGATCCGTAACTTTGGGATAAGGATTGGCTCTAAGGGCTGGGTCGGTCGAGCTGGGGTGCAAAGTGGGGCTGGACTCGAACCGCGGCTGGGGGAGCAGTCCCTCCGTCACCCTCCTCTCACCACCATTTCATTGTGTGGCCCATCTCGCGGTCTCTTGTGCGTGGTCTCGCAAGGGTCTGCGTGCGGGGATCCGTTGGGGTGGTGTCCGTCGGCGGACCGGTGGGGGGGGTTGGGTCCGGCGATTGGTGGCGGCAACTCTGGACGCGCGCCGGGCCCTTCTCGCGGATCTCTCCAACTATGGCGCTCGCCTGCCCCACGCATTG
C087R143	Unknown(2145bp)	scaffold of interest relatively low on list		Contig_2	0.94	only slightly repetitive but different versions	cgttccaggtcagccaaacgatactgagacgttcctagctgacatagaggacgcgttgggtggctacccggacgctacggTTTCTGACAGGGTTTACCTGTTGAAGCGAACGTCGAATAGACACGTGACGAGGTTCATTCGTCTACAACAGCAACACGTGCTAAATGACTATGCTAAACTTGCCACAGCTTTGAAATTAGAATTCAGTGGTTCTGCGACTCGCAAACACGATAGCTCACTGGCTAACACCGTCAAACAAGCTCGGAACGAACACCCACAAGCTTTCTATCATAGGCTTCGTTCAGCTTACTTTGGCCTACTCACAGAAACAGGAATGGAAGAGCTGTTACCATTCAAACAAATGTTTCTGTCGAACATGTATCCCACCTTCATTACCTA…
C236R089	Zinc finger protein 706	scaffold of interest relatively low on list		three with low scores	best is 80%	repetitive	atgcacaaaaagctCATTTGTCTCATTTTATTGCACAAATTTGTTTACATCCCTGTTAGTGAGCATTTCTCTGTCAAGATAATCCATCCACCTGACAGGTGCGCCATATCAAGAAGCTGATTAAACAGCATGATCATTACACAGGTGCACCTTTTGCTGGGGACAAAAGGCCACTAAAATGTGCAGTTTTGTCACAACACAATGCCACAGATGTCTGAAGGAGCATGCAAATATGTATGCAGGAATGTCCACCAGAGCTGCTGCCAAAGAATTTAATGTTCATTTCTCTACCATAAGTCACATTCATTTTAGAGAATTTGGCAGTACGTCCAACCGGCCTCAACCGCAGACCATGTGTAACCACGCCAGCCCTCCACATCTGGCTTCTTCACCTGTTAG…
C234R097	Unknown(1671bps)	none of interest		several with low scores	0.83	small portion repetitive	cgctggggCAGAAATGTCTTCAGGGAATTGATAAGGGGATAAATTACCAACAAATATTGTATGAATGGCAAACTTTTTGCTGTAGAGCGAGATAGAGAGCAGATATTCCTGTGATGTCTGCAAGTGAGATTTCTGTGACTTTTTAAAGTCAATACAATGTGTGATTTGTGACTTACAAGTTTTCCACTCAATGTTATTTGTATTGTTATTATTAATAATAGAATACATGGGACATAAAAAGGTTCTAACACCCTAAAAAGGTTATTTGAGGAACCTGTTTAAAAGGTTCCTCAGGGAAAGGTTCCTGGAAGTACCTTTGGTGGTTCCACCGGTGTGGCAATCTGAGGAAGTCATAAAGGTGTCTCCATGAACCTTTTTATTTTAGAGTGGGTGTACCTC…
C074R073	UNKNOWN	MMSRT100C/084G	0.95	n/a	n/a	Base Pairs 1-300 repetetive. Some Homology to uncharacterized protein LOC100191015 [Danio rerio] NP_001129460	gggggctaagatgacgccgaagagcatggctgacattttacatgcccgtaaccaattgtgctattctgttagtttttttgCATTGTTTGTAACGTAGTTTTTTAAACTTATTTTGAACATAATGTTGCTGCTACTGTCTCTTATGACCGAAAATAACTTCTGGAGATCAGAACTGGGATTACATACCACGAACTGGAAGAAGCTTTTTCCTTTAACGAGTCTGACAAGAAAGATATACTGCTCTCCCGGGAACAGGCTCAGATCCTCGTCATTTGCGTGAAGAAAAGACAGAGGAAAAGAGGATGCAGATCAGGCTACCTTTTGAGAATCCGTAGAGTCGTGGCTGAACGACGACAGGGATAATATAGAGCTGGAAGGATTTTCAATGCACCGGCAGAA…
C031R120	Cellular tumor antigen p53	MMSRT031G	0.95	n/a	n/a		TACTCGCCAGACCTGAACAAGTTGTTCTGCCAATTGGCAAAGACTTGTCCAGTTCAGATCGTGGTGGACCACCCTCCTCCTCCTGGGGCAGTGGTACGAGCCCTGGCCATCTATAAGAAGCTGAGTGACGTGGCTGACGTGGTGAGACGCTGCCCTCACCACCAGAGTACCAGCGAGAACAATGAAGGTACACATCACAGCGGGAAGGCTACTCTTATCCATACTAAAACATGTTAGATTGATCTAGAATGTTATACCGTGTGCTTTTCGATGCAGTATAGAGGGTCCACACTATAAAAGGAGTTTAAACGTCATTTTATACTTAAACTTGTTGCCTCCTTGAATGAGTAACGCAAATGTTTTGACTGGTAGGTTATCTTCAGTGTGTCGCTTAATACT…
C011R140	Cellular tumor antigen p53	MMSRT031G	0.9	n/a	n/a		TCTTTTTTTTTTTTTTTTTTTTTTTTTTTTTTTTGAAAAGTACATTTTTTTCTTTAATAATTTCATGAAAAAGTCAATGTATTTCTGTGGCAGTGTAATAAAGTGTTTGTTTGGTAGATATTCCGGTGTGTGTGTGTGTGTGTATACTCTACCTCTTAACAAAAATAAAAAAGGGTAGAAAAACATTTTAGGATACAAAAAAGATAAGAATCAATAATTGGACCTTAAAAAATATCCAACTAAGGCTGCAATTAACACTTTTTTACTATATTTCTGCAGTGTCTTACAAACTCCTGTACTGAAAACAGCAAGCATCTACCAGTGAGGGGAGTCTATTTGGCAGAACAGTAGAAGGTTCTTTACTCCAAACTTATTCCAGGCACACAGAACCAAATCAGC…
C119R146	UNKNOWN	MMSRT092E/059D/103G	97% highest	Contig_28	0.97	ribosomal	ggggTATGTCAGACAGTCATAATCAGTCATTTAATGTTAATGACAGGATATAATATGTCCCCAGGATTATGAAAAGAGAGACAACACTTTCCCAGGGGCAATGGAGAAAACGAACAGGGACCTTATCGATCTCATCGCTCAATTCCCACATCTACACCTGTGTGGTGGAGATGAGGAGATGGGCTGGATTGATCAAGAAATGGGAGTGACCTGCTGCCAAGAAGAGGAGCACAATGAGGAAATGGACTGGATCTCATCAAGCAATCCAAATTTCTGCGTCTGGAGAGAAAGAGAAGATGAAGATGATGAAGCCTAAACGGTGTCAACTGGATGGATTGTCATCAAAACATCTTTGCATTAAGGCCAGGAAATTGGTGCACAACGCAGCTGCATTTTGCA…
C215R018	CREB-regulated transcription coactivator 2	MMSRT069D	0.96	Contig_107, Contig_98	94%-100%		CTCCTCCCTGAGTGGCCAGTCCCTCCACACCGCATCCAGTAACCCTAGTTACAATAGCGGGGTGGGAGGGTCCGGCTCGTGCTCCTCTTATTCGCCACTGCTAACTAGCCAGGGGCAGTCGCCTCTCAGCACGTTGCCACGGAGACGAGCTCAGCTCTCCCCTCTGATCCTACCCATGGGAGGGGAGTCTCGCCGACACCACTCCAAACAGTTCTCCCCCACCATCTCTCCTAACTTGTCCTCCATAACACAGGGTGTCCCTCTGGACACCAGCAAACTCCCCATGGACCAGAGGCTCCCTCCCTACCCCCTTCAGCCAACCCCAGCAGCAGCTTCATCAGCCAGGTCCTCCAGCATCCCATCAGCCCCAGCAGGCCTCTCAGGTAGGACAACAGCTCT…
C216R085	G protein pathway suppressor 2	MMSRT031G	0.95	n/a	n/a		gggggaacatgccaatcaacaatctggcttcactgactctagtgctctacggtccatgcaccctcaggctcttcatgccaGTGCTGCAGGCCTGCTGCCTACCCCCTCCCTCACAGTGCAGATCCCTGTTAGTTACGCCAGCAGCTCACAGCTTAGAGGTGCCTCAGCCTTCCAAGCCATGCAGTACCTGCCTCAACAACAGCAGGGCTACGCTGTGCACAGCCACTTTACCTCTCAGCCAGGATTTATCCCTAGTGCTGGGATCCCTCTACAGAAGCAACTGGAACATGCCAATCAACAATCTGGCTTCACTGACTCTAGTGCTCTACGGTCCATGCACCCTCAGGCTCTTCATGCCAGTGCTGCAGGCCTGCTGCCTACCCCCCCCCGTCCGGCCTC…
C070R030	DENN domain-containing protein 4B	MMSRT069D	0.95	Contig_153, Contig_174	85%, 97%		GGACACACTGACCCCTGACACAGACTACTGGCCCCCCCTCTACATCCTGTGGAGGATACACAGTGGCGTACCCATGCGGAACCACAGCTGGCGGAGGCACAACCACCCCTTCACCCTGGCCTTCCTGGAGGAAGTGCTGCGCTGGGTCGGCATGAACGAGGTACACAAGGGAATCACTCTCTTCCTGGAAACCATTGCCAAGCAACCAGGCACACCCAAGATACAAAGGAGTCTGTACAGAGAGATGCTCTTCCTCACGCTGGCTGCCATGGGTAGAGATCACGTTGCTGCGTTTGATAAGAAATACAAGGCTGCGTACCAACGGCTGAGTGGCTCCTTGGGCCGCGAGGAGCTCCGCAGGAAGCGAGCCCAGCCCCCTAGCCCCAAGGCTGTGGACTG…
C125R083	UNKNOWN	none of interest	96% highest	Contig_28	0.98	repetitive	TTGCGACAATGGCGGCGGATAGTTTCAGGAATAGAGGGTCCAGATTGTCAAGCCCAGCTGATTTGTACGGGTCCAGGTTTTGCAGCTCTTTCAGAACATCTGCTGTTTGGATTTGGATTTGGGTAAAGGAGAACCTGGAGAGGCTTGGGCGAGTAGCTGCGGGGGGGGGGGAGCTGTTGGACGAGGTTGGAGTAGCCAGGCGGAAGGCATGGCCAGCCGTTGAGAAATGCTTGTTGAAGTTTTCGATAATCATGGATTTATCGGTGGTGACCGTGTTACCTAGCCTCAGTGCAGTGGGCAGCTGGGAGGAGGTGCTCTTGTTCTCCATGGACTTCACAGTGTCCCAGAACTTTTTGGAGTTGGAGCTACAAGATGCAAACTTCTGCCTGAAGAAGTTGG…
C265R056/C082R060	Calcium-binding protein P	scaffold of interest relatively low on list		Contig_51, Contig_28	0.86	repetitive within trout draft genome	CCACCACACGACCAGCTGACATCCAAGCAGACCCAGCATCTTCCCACCTGGAAGTTGTGGACATCACCCCCAAAACAGAGGCAGACCCGGCTTGTTCCCACCTGGAGGTTGTGGACATCACCCCAAAAACAGAGGCAGACCCGGCTTGTTCCCACCTGGAGGTTGTGAACATCACCCCTAACACAGAGGCAGACCCGGCTTGTTCCCACCTGGAGGTTGTGAACATCACCCCTAACACAGAGGCAGACCCGGGTTGTTCCCAACTAGATATTGTGGACATCACCCCAAAAACAGAGGCAGACCCGGGTTGTTCCCACCTGGAGGTTGTGGATATCACCCCTAAAACAGAGGCAGACCCGGCATCTTCCCACCTGGAGGTTCAAGACATTACCCCAAAAA…
C150R126	Integumentary mucin A.1 precursor	none of interest		Contig_28	0.99	repetitive within trout draft genome	CGACCAGACTCTTCCAGATCTGCCAGTCGACCAGACTCTTCCAGATCTGCCAGTCGACCAGACTCTTCCAGATCTGCCCGTCGTCCAGACTCTTCCAGATCTGCCAGTCGTCCAGACTCTTCCAGATCTGCCAGTCGTCCAGACTCTTCCAGATCTGCCAGTCGACCAGACTCTTCCAGATCTGCCAGTCGACCAGACTCTTCCAGATCTGCCAGTCGACCAGACTCTTCCAGATCTGCCAGTCGACCAGACTCTTCCAGATCTGCCAGTCGACCAGACTCTTCCAGATCTGCCAGTCGACCAGACTCTTCCAGATCTGCCAGTCGACC
C220R056	Transposable element Tc1 transposase			Contig_2, Contig_21	94%, 92%	TE	GGGGATATCCACATAATTTTCTTTCCTCATGATGCAATCTATTTTGTGAAGTGCACCAGTCCCTCCTGCAGCAAAGAACCTCCACAAAATGATGCTGCCACCCCCGTGCTTCAAGGTTGGGATGGTGTTCTTCGGCTTGCAAGCCTCTCCCTTTTTCCTCCAAACATAACAATGGTCATTATTGCTAAACAGTTCTATTTTTGTTTCATCAGACCAGAGGACATTTCTCCAAAAAGTACAATCTTGTCATGGCTGTTTGAAGGATCGGACCAAAATGCAGCGTGTTCGTAATTCCACATATTTATTTATTCCGTGAAACTAAATGCAATACATACATTTACTTGAAACACAAAAAAACAACAAACCGTGACGCAGAGAGGAAAACACACTACTCAAAAG…
C174R030/C014R165	Transposable element Tc1 transposase			Contig_2, Contig_21	96%, 96%	TE	CAAACTCTCTCCAGAAGTTCAGTGAGGATCTCTGAATGATCCAATGTTGACCTAAATGACTAATGATGATAAATAGAATCCACCTGTGTGTAATAAAGTCTCCGTATAAATGCACCTGCTCTGTGATAGTCTCAGAGGTCCGTTTAAAGCGCAGAGAGCATCATGAAGAACAAGGAACACACCAGGCAGGTCCGAGATACTGTTGTGGAGAAGTTTAAAGCCGGATTTGGATACAAAAAGATTTCCCAAGCTTTAAACATCCCAAGGAGCACTGTGCAAGTGATAATATTGAAATGGAAGGAGTATCAGACCACTGCAAATCTACGAAGACCCGGCCGTCCCTCTAAACTTTCAGCTCATACAAGGAGAAGACTGATCAGAGATGCAGCCAAGAGGCCC…
C109R084	Transposable element Tc1 transposase			Contig_2, Contig_21	97%, 96%	TE	aAGAAAagcAggccCaAACCATGaTGCtgccaccaCCAtatttgACAGTGGGGATGGTGTGTTCAGGGTGATGAGCtGTGTTGCTTTTACGCCAAACATAACGTTTTGCATTGTTGCCAAAAAGTTTGATTTTGGTTTCATCTGACCAGAGCACCTTCTTCCACATGTTTGTTGTGTCTCCCAGGTGGCTAGTGGCAAACTTTAAACAACACTTTTTATGGATATCTTTAAGAAATGGCTTTCTTCTTGCCACTCTTCCATAAAGGCCAGATTTGTGCAGTATACGACTGATTGTTGTCCTATGGACAGAGTCTCCCACCTCAGCTGTAGATCTCTGCAGTTCATCCAGAGTGATCATGGGCCTCTTGGCTGCATCTCTGATCAGTCTTCTCCTTGTAT…
C083R008	Transposable element Tc1 transposase			Contig_2, Contig_21	0.94	TE	aaatggaaagaaatttattggatatttcaaacttcttttAACAAACAAAccgAAAAATTGGCcgtgccaAATGAccccccCCccttaCTtTcagtgcagcAaAcTCccccgaagtTcagTGAGAATccctgAATGATCccaTGTTGACccaAATGACTAATTATGATAAATAGAATCCccccgTGTGTAATCAAGTctccgtATAAATGCccccgccctgtgATAGTctcagaggtccgtTtAccgcccagagaGcctcctGAAGAACAAGGAAcccacccggcaggtcccAAATACTGTTGTGGAGAAGTTAAAAGCccGATTTGGATAcaaAAAGATTTCCccaGcTTTAAAcATCCcaaGgAgcacTgTGCAaGcgaTAATATTGAAATGGAAGGA…
C037R135/C030R110	Transposable element Tc1 transposase			Contig_21 and others	0.99	TE	agaggatgaggtaaatcaaaccaaaacaagctacttgaaggttgaagcacatccccaacacccagacagacaccaggtgcTACAGAGGCAGAATATTCCAAGAACCTCCACAGCCATCTGACCACCTACCTGCGATCTCTCCACAGCACAGAGAAGTGAGTCTGCTGGGCTGTGGAACTCTAGAGCAGCACATCAACGAACCTGCCACCCTGTCAGCAGACAGTTCCCAGAGGAAGGATGCAACTATCAAGGCTGTAAATGGTCACATTTGGGGGATGACCACCAAATGCAATAAAGTTTTGTATAAACTACTCATGTTTTTATTTTACTTTAATAGGTTACAAAACATAACTTTTTCATGGCCTGTTGGTCTTTTCATTTTTACTAAACGACTAAGAT…
C137R053/C112R062	Transposable element Tcb1 transposase			Contig_2	0.87	TE	ttggtgctgaccaagtataaccacaccagcccaggatttccacttctggcttcttcacctgcagaattatctgagaccagCCACCCAGACATATGATGAAACAGAGGAGTATTTATGTCTGTAATAAAGCCCTTTTGTGGGGGAAAAACTCATTCTGATTGGCTGGGCCTGGCTCCCCAGTGGGTGTCCCTATGCCCTCCCAGGCCCAACCATGGCTGCGCCCCTTCCCAGTCATGTAAAATCCATAGATTAGGGCCTAATGAATTTTATTTATATTGACTGATTCCCTTATATGAACTGTAACTCAGTACAATCGTTGAAATTGTTGCATGTTGTGTTTTTATATTTTTGTTCAGTATATTTACACTACTTTGCATTTGTCTGGGCTTGTTAGCAGTA…
C109R093	Transposable element Tcb1 transposase			Contig_2	0.9	TE	gggggagttccaaagaaacagatggtcgtagaccttttataaatctgttaatggctaccagaagatccacaaacgattgaATATATGACTGAGcAcTgTcAGGGCGATTATTAAAAAATTTAAAAGATATGGAACAgTTGAAAACCTcacGGGTAGAGGACGCAAATGCATTTTGCCCCCCAGGATAGGGGGGAGGATCGTGAGAGAAGCAACAAAATCCCAAAGAATCACTGTGAAAGAATTCCAGGCCTTGGTGGCATCTTGGGGTCACCAGGTTTCAAAAAGCACCATCAGACGCCACCTCTACAACCATAGACTCTTTGGAAGGGTTGCCAGAAGAAAGCCCTTAATGACCCCAAGACACAGGCACCTCATACCCACGGTGAAATATGGTGGTGG…
C042R032	Transposable element Tcb1 transposase			Contig_2	0.83	TE	catttagaagcttttattttcatatttaccaatgtaaaacatacactatatatacaaaagtatgGTGGATTCGGCTATTTCAGCCACACCTGTTGCTGGCAGGTGTATACAAATCGAGCACACAGCCATGCAATCACTATAGACAAACATTGCAGTAGAATGGCCTTACTGAAGAGCTCAGTGACTTTCAATCGCACCTTCATAGGAAGCCACCTTTCCAACAAGTCAGTTGGTTAAATTTCTGCCCTGCTAGACCTGCCCCAGTCAACTATAAGTGCTGTTATTGTGAAGTGGAAACATCTAGGAGCAACAAGGCTCAGCCTCAAAGGGATAGGCCACACAAGCTCACAGAACGGGACCGCCGAATGCTGTAGCGCATAAAAATTGTCTGTCCTAGGG…
C020R105	Transposable element Tcb2 transposase			Contig_28 and others	0.93	TE	tgcactgtggagctacaacaaagcatttcgctacacccacaataacatctgctaaacacgtgtatatgacaaataatttgATTTGAAAAACTTCCATTTCAAATTTCCACTCGGGCAGCCCTGAGAACCAATAACTGAGCATGCATAAAGCACTTAGCTTGAGACTGTTTTCTTTAAGCAGATAACATTATAATGCAGTTTAAACCACCTCTGTGCGAATGTATGTAATGTGCTCCAGTGTGCCCAAAGTCATTTTCCAGTGCGTTGTCTCCATGTCTCCATTCTTGATGTGAATCAGTTCTAGCGTATTAATATGTTTTATGGAAATAGGGTTGGAAATAGGTGTTTCCCTAATGACAATCTAAAGAGCCTAACTACAACTGGTAAAAATGTGTCACA…
C017R059	Transposable element Tcb2 transposase			Contig_28 and others	0.93	TE	cgatctgataaatatgtatttattaaacgtctacatatgtacattctcagagattaaggcatttaagttaattgtaAAAATATATACTGCTCAAAAAAATAAAGGGAACACCAAAACAACACATCCTAGATCTGAATGAATGAAATAATCTTATTAAATACTTTTTTGTTTACATAGTTGAATGCGCTGACAACAAAATCACACAAGAATAATCAATGGAAATCCAATTTATCAACCCATGGAGGTCTGGATTTGGAGTCACAATCAAAATTAAAGTGGAAAACCACACTACAGGCTGATCCAACTTTGATATAATGTCCTTAAAACAAGTCAAAATGAGGCTCAGTAGTGTGTGTGGCCTCCACGTGCCTGTATGACCTCCCTACAATGCCTGGGCAT…
C061R024	Transposable element Tcb2 transposase			Contig_21 and others	0.96	TE	ggggCTGCTCAAACGGTCAGAAACAGACTCTATGAGGGTGGTATGAGGGCCCAACGTCCACAGGTGGGGGTTGTGCTTACAGCCCGACACCGTGCAGGACGTTTGGCATTTGCCAGAGAACACCAAGATTGGCAAATTCGCCACTGGCACCCTGTGCTCTTCACAGATGAAAGCAGGTTCACACTGAGCACGTGACAGATGTGACAGAGTCTGGAGACGCCGTGGAGAACGTTTTGCTGCCTGCAACATCCTCCAGCATGACCGGTTTGGCGGTGGGTCAGTCATGGTGTGGGGTGGCATTTCTTTGGGGGGCCGCACAACCCCCCTTGTGCTCGCCAGAGGTAGCCTGACTGCCATTAGGTACCGAGATGAGATCCTCAGACCCCTTGTGAGACCATA…
C265R135	Probable RNA-directed DNA polymerase from transposon BS			Contig_2, others with lower homology	0.94	TE	ccaaacagttatatttttggttcatcagaccagaggacatttctccaaaaagtacgctctttgtccccatgtgcatttgcAAATCGTAGTCTGGCTTTTTTATGGCGGTTTTGGAGCAGTGGCTTCTTCCTTGCTGAGCAGCCTTTCAGGTTATGTCGATATAGGACTCGTTTTACTGTTTCCTCCAGCATCTTCACAAGGTCTGTGAAGATGAAAATCTGGACCCCTACAAATCAGCCGGGCTAGACAATCTGTACCCTTTCTTTCTAAAATTATCTGCTGAAATTGTTGCAACCCCTATTACTAGCCTGTTCAACCTCTCTTTCGTGTCGTCTGAGATTCCTAAAGATTGGAAAGCAGCTGCTGTCATCCCCCTCTTCAAAGGAGGGGACACTCTTA…
C079R126	Probable RNA-directed DNA polymerase from transposon BS			Contig_2	0.94	TE	ggggattgaaagtcagccttcgatcCAAGCCCATGTAATGCTTTGTAGGTTAGCAGTAAAACCTTGAAATCAGCCCTTGCCTTAACAGGAAGCCAGTGTAGGGAGGCTAGTACTGGAGTAATATGATCAAATTTTTTGGTTCTAGTCAGGATTCTAGCAGCCGTATTTAGCACTAACTGAAGTTTATTTAGTGCTTTATCCGGGTAGCCGGAAAGTAGAGCATTGCAGTAGTCCAGCCTAGAAGTAACAAAAGCATGGATTAATTTTTCTGCGTCATTTTTGGACAGAAAATTTCGGATTTTTGCAATGTTACGTAGATGGAAAAAAGCTGTCCTTGAAACAGTCTTGATATGTTCTTCAAAAGAGAGATCAGGGTCCAGAGTAACGCCGAGGTCCTTC…
C139R143	Retrotransposon-derived protein PEG10			Contig_2	0.86	TE	CCTACCACCACTCCTAGCATTCGTGACAGAATCCCGCACCTGATTATGGAGTCAGCAGGAGCAGCCGCACCTCCTCTCCCATCGATGGAGGAAAGGGTCCTCCATCATACCAGCATTCTCCACCGGATCGGTTCAGCTATGGATCAGATGATGGAGTGGATGGACCGATGGGAGAGGAGTGGCCTCCCTACTGCATCTCCAGCTCCTCTTCCCCCTCCACCTGCTACCCCTCCTCCAGCGTCCGGACCCGGGGCCCTACGCCTGGCTCTCCCCAGGGAGTACGATGGAGCGGCGGCTGGGTGCCAGGGGTTCCTGCTGCAGCTGGAGTTGTACCTGGCTACCGTTCGTCCGTCTCCTGCTTAACGGGTCGTGCCCTGGAGTGGGCCAACGCAGTGTGGT…
C126R117	RNA-directed DNA polymerase from mobile element jockey			Contig_28	0.83	TE	GTTTGCTGAGTAGAGTGTTTGTTGGCTATTTTGTAAATGACCGCTGAAGTCGAGGATCTGTAGGATAGTCAGTTTTACGAGGGTATGTTTGGCAGGTTGAGTAAAGGAGGCCGATTTCTAGATTTTATTTTGGATTGGAGATGTTTAATATGAGTCTGGAAGGAGAGTTTACGCTCTAGCCAGACACCTAGGTATTTGTAGTTGTCAACATATTCTAAGTCAGAACCGTCCAGAGTAGTGATGCTAGTCGGGTGGGCGTGTGCAAGCAGCGAACGGTTGAAAAGCATGCACTTAGTTTTACGAGCGTTTAAGAGCAGTTAGAGGCCACGGAAGGAGTGTTCTATGACATTGAAGCTCATTTGGAGGTCCAAAGAAGGGCCAAATGTATACAGAATGGTG…
C013R008	RNA-directed DNA polymerase from mobile element jockey			Contig_28 and others	0.88	TE	cacGGGTGCACCACAGCCACGCTCAAGGTCCTAAACGATATCATAACCGCCATCGATAAAAGACAGTACTGTGCAGCCGTCGTCATCGACCTGGCCAAGGCTTTCGACTCTGTCAATCACCGTACTCTTATCGGCAGACTCAACAGCCTTGGTTTCTCTAATGACTGCCTCACCTGGCTCACCAACTACTTCTCAGACAGAGTTCATTATGTCAAATCAGAGGGCCTGTTGTCTGGACCTCTGGCAGTCTATATGGGGGTGCCACAGGGTGCAATTCTCGGGTCGACTCTCTTCTCTGTGTACATCAATGATGTCGCTCTTGCTGCTGGTGAGTCTCTGATCCACCTCTAAGCAGACGACACCATTCTGTATACTTCTGGCCCTTCTTTGGACACTGTG…
C080R125	Retrotransposable element Tf2 155 kDa protein type 3			Contig_2, Contig_21	88%, 85%	TE	CACCTGCCCAGAGGGAAGTTACAACCCCTACCCATTCCGCAACGGCCGTGGTCGCACCTGTCGGTGGACTTCCTGACTGATCTTCCTCCCTCACAGGGCAACACCACGATCCTGGTCGTTGTGGATCGGTTTTCTAAGTCCTGCCATCTCCTCCCTTTGCCCGGTCTCCCTACGGCCTTACAGACTGCGGAGGTCCTGTTCACTCACGTCTTCCAGCACTACTGGGTGCCTGAGGACATAGTCTCTGATCGGGGTCCCCAGTTCACGTCCAGGGTATGGAGGGCGTTCATGGAACGTCTGGGGGTCTCGGTCAGCCTCACCTCAGGTTTTCACCCTGAGAGTAACGGGCAGGTGGAGAGAGTAAACCAGGATGTGGGTAGGTTTCTGCGGTCATATTGC…
