# Supplementary material for: Characterization of the OmyY1 Region on the Rainbow Trout Y Chromosome
Source: Int J Genomics. 2013 Mar 11;2013:261730. doi: 10.1155/2013/261730 (PMC3647546; doi:10.1155/2013/261730)
Supplement: Supplementary file 2 [file 261730.f2.xlsx]

## Sheet: Sheet1
44K array designation	Gene name	Miller scaffold	Miller scaffold homology	Omy contig	Omy contig homology	Notes	ESTseq
C262R066	F-Box/WD repeat containing protein 2	MMSRT112A/121C	0.97	Contig_2	0.97		tcgggTCACCAAGGTGATTCTTCAGAAGAGTGAAGTAGAATCCATGGTGCACTGTCCTGGTGACTACATTCTGTTGAGTGCTGACAAATATGAAATAAAGGTTTGGCCTATAGGCAGGGAAATCAACTGCAAGTGCTTGAAGACCTTGTCCGTGTCAGAGGACCGTAGTGTGTGTCTGCAGCCTCGCCTGCAGTTTGACGGCCGCTATGTCGTTTGTAGCTCGGACCTGGGGGTCTACCAGTGGGACTTTGCCAGCTTCGATATCCTCAGGGTCATCAAAACGCAGGACCCCGCCAACCTTTCCCTGCTCAGCTTCGGCGAGGTGTTCTCGCTCCTCTTCGACACCGACTTCCTGTATGTCATGGACCTGAGGACAGAAAAGATAACGGGTCGTTGGCC…
C179R024	F-Box/WD repeat containing protein 2	MMSRT112A/121C		Contig_2	0.99		CCAGGACAGTGCACCATGGATTCTACTTCACTCTTCTGAAGAATCACCTTGGTGACCCACTCAGTATGTCCCGTGAGGGTGTTGAGGCAGGCGCCTGCCGACAGGGACCACACCTTCACAGAGAAGTCGGCCGAGCCGCTCACCAGCGTGTCCAGGTCATCCTTGTAGTCCACGCTGAACACTGCACCCGTGTGCCCACGGAACTGCTGGATCTTGGCACCTGTGCTCCACTCCCAGCAGGCGATAGTGTTGTCAAAGGACCCAGTCACCAGCTTCTGCTCATCAAACTTCACTGTGGCACAGGTGTGTGTCTGAATGCCGTAGATGCACTGCCCGGTGCGGACGTCCCACAGTTTGGCAGAAAGGTCATCAGAGCCTGTGCAGAGAAGGCCGTCCTTG…
C029R137	Na/K/2Cl co-transporter (nkcc1a)	MMSRT112A	0.99	Contig_2	0.99		CAAGGTCGATAGAGCATCCTACTCTTAAAAAAACATCACACCGCGGATTTTATTCGCTTTCGTACAAGTGTGCGGAAAGCTAGAGGACCGAGAGGCTACTCGGAGATTTAATCTCTTGATGAGTAGCGTTGGCTAGGGCTGAAAGTTGATGCCTTTTTTTTTTCATCTCTGAGAGCGTATAGTGAGACAGCTAGCAAGCCATCCTTCTCCATTTGTAGCTCTGCATGTTTTGTGGTTGTGCTACCTTTTTGAGAGAGGCAGAAGTGGCATTCGGCTCTTTCTGAATTCGAAAGCACCGCGTTTCTCTGGGAGCAACTATCCAGACGGTCTTCCACCACTTGGGCGGTACCAGGAGTGTGAGCTGACTGCTTATGTCGGAAAGAACCGGGGTTTAGAAGC…
C264R086	cAMP-responsive element-binding protein 3-like protein 4	MMSRT014G/069D	96%, 92%	Contig_121	0.96		aatgattgacatgagaattgccagctggatttttgtGAGAAATGCGTCTTACACTGGTTGATCTTTAAACACTACTCGTCTGCATTTTTCTCCTCACGTTGGGCCTACTATTGTTGTAATGCTCTTGAAGTAGACCTATATATATATTCGGAAGAATCATCGCTTCTGAAAACCGCAGCAGACAAGACATGGATATAGAGAATGGAGAGCTGTTTTTCGGACACAAGGAGGACAGTATGTCAGAGGAGAGTTGGGGACTGGAAGGGCCATTTTCTTGCTCTGATGTTATCTATGCTGGCTCTGAAAAACCCCTCGATGAATGCACGGTAGACCCCCAAAGTGGTCTAAACAACAGCGAGCCAGAGGATGTGCTTTATGCCATCAATCCAAATGACGTCT…
C117R024	CREB-regulated transcription coactivator 2	MMSRT069D	0.92	Contig_107	0.94		CGCCGGGGCACAACGTCCCTAACATCATCCTCACAGGAGACAGTTCATTGGGCCTCTCCAAAGAGATCGCCAGCGCCCTGTCCCACGTGCCAGGGTTTGAGATGGATTCCTTTACCCTGGATGACCCCCTCAGGATGGACCCCCTGGCCCTTGAGGGGCTGGGCATGCTGGACGGGGACCTCATGCTGACTGACCCTGCCGTGGAAGATTCCTTCCGCTCCGACCGCCTCAAGTGACCCCCCCCCCCAGGAGTGGATACGGAGGAGTGAGGAGGGAAGGGGGTTGGAAAGACCCCAGACTGAAGTGGAACAGGTGGGGATGAGCCCTGCTTTGTTTCCCCCTCCTTGGCGATTGACCCAACCACAGCATCTGCGAAAAAAGGTCAGGTGGGAGGTTTTG…
C202R064	Unknown(751bp)	MMSRT112A	0.96	Contig_2	0.96	420 to 575bp region absent on blastn and blastx	GAGAATACAAGTTTTTATAAGACTGGGTAAAGCACCAGCGAAAACAATGACATGGTTAGTTTCTTACAACATTTCTCCTACCCAACATATCTCCATGACTTGTTTTGATCACAGAATTAGATATATATATAAAATTAAATGTGTTCAAGCTGTACTCAGGGGTAAACATAACATAGTAAAAGTAAATTCACTCACTCAATTTAGTATGATGCTGCATTTCCTATGGTATTATTGATTTGTTGATGTCCATCATCCATTTCATGTTACGAATTACGATTTGTACAATATGTTATGAATTTGCAATACGTATGATATGTGACCAATTCCAATTGGTTACGGCTAACGTTAGCTAGATTGCTAGGTGGCTAATGTTAGCAAGGTCAGGAGTTAGGTTAAAGG…
C111R146	Unknown(1636)	none of interest	0.99	Contig_28	0.99		attactccaatctgtcctactgaaaaacgaattgtcccggtggatatattatcgaatagatatttgaaaaacatcttgagGATTGATTATAAACAACGTTTGCCATGTTTCTGTCGATATTATGGAGCTAATTTGTAATATTTTTCGGTGTTTTCAGTGACCGCAATTGCCGGGCGATTTCTCAGCCAAACGTGAAGAAAACACGGGAGCTATTTCTCCTACAAAAATAATATTTTTGGAAAAAAGGAACATTTTCTATCTAACTGGGAGTCTCCTTACTGAAAACATCCGAAGCTCATCAAAGGATCGGGAACCAGTGTGTCCAGTGCGCGGGCTCGCTATAGGTGAGCCCACAACGGTTTGGCGCAACGTGGCCCATCCTGCTCTCCTGAATCGGCA…
C053R110	Zinc transporter ZIP1	MMSRT069D	0.9408	Contig_108, Contig_110	0.993		ACAGAGTGCAGTTTTTTGGCATAGCAGTAATGTAATTTTGCTGCCTTTTTCCCACTTGTTATTAAGTCTGTGCCAATACAAGCTGCTCACCAAGGCTGTCCTTTTATGAGAGAATACGACAGAAGGTGGTCTACCCCTCCCCATTCGACTGTAAGCCAATGGAGGGCGTCTGAGAGCTACTCTTTGCTGTTTCACTCAAGAGTGAAAGAGAAGCAGGGAGTGCAGAGATGGCTCTCAGAAAAGGATCTTCTGTTGCCCTCTCCGGGTGGCCATCTGAAGTGCAGATGAACCCAGCTTATGTCCCTGGCCTGGAGGTAAAGCTGGGAGCACTGGTTGTTCTTTTCTCCATCACACTGGTCTGTGGCTTCGCCCCTTTGTGCTTAGTCAGGGGGGCAGGGA…
C014R029	Zinc transporter ZIP1	MMSRT069D	0.8056	Contig_108	0.98		aaattatttcagATTACTTTTAATCAGTAAACCAGGTACAGATAAACATGTAGCTGATATAAAAGTGAACATAAAAACAAGAGCAGCCATTTCAATTATTCAAACACAAGTTTTACAAGAGAATAGAGGACTAATTCAAAGCTCTCACCACATGGCAGTGAAATCAGGGCCTATATTTAGATCTCAATGTAAGGCTCTGACAAAGAGCAACCACTCCATTTATCTTTTTAAGCATTTAAAGTAGAAGCCAGCTGTATATGCTCTTATGTTTTTTTTAGGGGCTAGGCAGTCATACTACTGAACAAACAAATGTGTGTACAATTCAGGACACACCTAGTCAGATTTCACAGCCAACAAAACATTAGGTATGCTATAATATCAAACCAGGAGTTATATAAT…
C057R047	Unknown(1268bp)	MMSRT069D	0.94	Contig_135	0.89		gggggatggacctttagtagtagtagactgggatggaccttgagtcacccatcaccggtttttcATTCACCTCACATTTAGGCCAGTAGTGGGTTAAGGATTGTTGGCAGAGATCAAAGAACTTCAGAAGATCCACTTGAGTGGAAGGGTTTAAAGAGAGTAAGGTACTTCACTGTGGAGCACATACTTACCTACTAGATTCTTGTTTTCATGTACAGTACCTGTGAGGCCTTTCCCCCTCTTATTTTAACACTTTATTTGTTGTTCAGCTTTGTATATGAAAACAAATTAATTGCACAATGGACTTTTCATTTTCTTTCAATTTCATATGATGTTGCCACACTGTTAAATGCCTCTGTTACCGTCATATATTGTTTTTGTTCTTGCAGTGTTATGTAG…
C023R097	Uncharacterized protein F54H12.3	MMSRT112A/121C	0.91	Contig_2	0.91		gggggatatgatgtcggtatacacaaatatgttgtaaaaccctgcatgtatatccgcagggaatggggctaatttatcttTCATATACGTCCATTTATTGGGAACCATCCCCAACATGTAGGCTAAATTACCGGTGGTCTTTATACCCCTATCCGCAGCCCCTGGGATTTGTACACGTTTATGAATAGGGTTGTAGCTCAAGAGTATTTCCGTATTGTTCTGGGTTAGGAGTTCGTTCAACTCTGAGACGATCCTGTCGATGGTTCTATAGAACCCTTTTTTAATCTTTATAAGTTTCGCAGGTTCCGATATCCTTTTGCAATAAAAATCCCGGTCCTTATCCTTGATATTATACCAACTATGTGGGTATGTAATCTCGCTGAGACCTACTTCCCACGC…
C120R010/C129R084	Peroxisome proliferator-activated receptor delta	MMSRT121C (third on list)	0.95	Contig 28 highestof 6	0.95	repetitive	CAGATCTATGAGAATTTATTGTCCAGCGAGCAGGATCCATACGAGTTGCAGATGCTCTACTTCCATTACGCTACATACAAAAACTTCCACATCCAGGATCGCAATGCATCAATTGATTATCACAAGAAGGCAGCAGAAATACCAAATCCTAACAAATACGGTAAAAAGAGTTTCAACATCTTGAGGAAGATTGAACAACGGGGAAGAAATCGAAGATGTGCAGAAATCTTGGAATTTCTCGAAAACCTTTCTTCTCACAATGAATAAGAGCAAGGAGGAGAATTAACCAATCAAAGAGGTTAACCAAATTGAGGGTCCCATACTGTACATACAATGTATTTTATTTTTATGCTCTTTGGGCTCTTTAGACCAGGTTGCTGCTATGCAAATTGTGCCAAA…
C099R063	Inositol Monophosphatase	MMSRT092E/107C/059D/036A	0.99	Contig_28	0.99	1 half of EST is ribosomal	CTGGTCACAATGTGTCTTTTAATCCTCTACATCCGTCTACAAATGTGGGCACAAACAGGATGTGGACACAGTCAGTACAAAGGAGGACGCATGTCAGTACTAGGTATAAAACCTGGCTATAAGACTTAACATAAAGACATCATGAAAGCTCATTCATGATTTTAACAAGTAATAAAAAAATTATATAAAACTGTAGGCTTTAAGTAAGTACAGAACTATATTATGCAAGTGGATACACATTTAACAGCACATTTCAAATGAAAATGCAGTCCAGTAGGGTGCAACATTTAGTGGACATAGTTCTATCCGGACCCATCACACTCCTGGACAAGAGCCCCTTTTTCAGCTGCATTAAACCTTGAATTTACTTAGTTTTTACATTTCAGTCATTTAGCAGAT…
C146R138/C250R044	Unknown(7630bp)	MMSRT092E/059D/103G	0.97	Contig_28	0.97	ribosomal	ggggTATGTCAGACAGTCATAATCAGTCATTTAATGTTAATGACAGGATATAATATGTCCCCAGGATTATGAAAAGAGAGACAACACTTTCCCAGGGGCAATGGAGAAAACGAACAGGGACCTTATCGATCTCATCGCTCAATTCCCACATCTACACCTGTGTGGTGGAGATGAGGAGATGGGCTGGATTGATCAAGAAATGGGAGTGACCTGCTGCCAAGAAGAGGAGCACAATGAGGAAATGGACTGGATCTCATCAAGCAATCCAAATTTCTGCGTCTGGAGAGAAAGAGAAGATGAAGATGATGAAGCCTAAACGGTGTCAACTGGATGGATTGTCATCAAAACATCTTTGCATTAAGGCCAGGAAATTGGTGCACAACGCAGCTGCATTTTGCA…
C234R042	Unknown(4037bp)	MMSRT103G/136F/092E/059D	0.99	Contig_28	0.99	ribosomal	gtttttcttctgaactggggccatgattaagagggacggccgggggcattcgtattgtgccgctagaggtgaaattcttgGACCGGCGCAAGACGGACGAAAGCGAAAGCATTTGCCAAGAATGTTTTCATTAATCAAGAACGAAAGTCGGAGGTTCGAAGACGATCAGATACCGTCGTAGTTCCGACCATAAACGATGCCAACTAGCGATCCGGCGGCGTTATTCCCATGACCCGCCGGGCAGCGTCCGGGAAACCAAAGTCTTTGGGTTCCGGGGGGAGTATGGTTGCAAAGCTGAAACTTAAAGGAATTGACGGAAGGGCACCACCAGGAGTGGAGCCTGCGGCTTAATTTGACAACACGGGAAACCTCACCCGGCCCGGACACGGAAAGGATTGA…
C205R054	Fructose-bisphosphate aldolase A	none of interest	89% highest	Contig_2	0.9	repetitive, transposon-related	gtcacttgacatttaacagtactagacatccttcattgccgatattgcaacagaacgcatcgcttccctctttaaaccgtAAAGTTACAGCTTTTGCTCTATTATCTTGTGCAGATAAACTGCTCTCGCTCTTGCTTTTGCTCTCTCTATCTCTCTCTCTCTCAGAGACACGATGCCTCACTCATTCCCATTCCTCTCTACGGAGCAGAAGAAGGAGCTCAGTGATATTGCTCAGAAGATCGTTGCTCCCGGCAAGGGAATCCTTGCTGCCGATGAGTCTACTGGCAGCGTCGCCAAGCGTTTCCAAAGCATCAACGCTGAGAACACTGAGGAGAACCGCCGTCTTTACCGCCAGCTCCTCTTCACGGCCGACCGCGTAGAGCCATGCATCGGTGGAGT…
C215R018	CREB-regulated transcription coactivator 2	MMSRT069D	0.95	Contig_107	0.94		CTCCTCCCTGAGTGGCCAGTCCCTCCACACCGCATCCAGTAACCCTAGTTACAATAGCGGGGTGGGAGGGTCCGGCTCGTGCTCCTCTTATTCGCCACTGCTAACTAGCCAGGGGCAGTCGCCTCTCAGCACGTTGCCACGGAGACGAGCTCAGCTCTCCCCTCTGATCCTACCCATGGGAGGGGAGTCTCGCCGACACCACTCCAAACAGTTCTCCCCCACCATCTCTCCTAACTTGTCCTCCATAACACAGGGTGTCCCTCTGGACACCAGCAAACTCCCCATGGACCAGAGGCTCCCTCCCTACCCCCTTCAGCCAACCCCAGCAGCAGCTTCATCAGCCAGGTCCTCCAGCATCCCATCAGCCCCAGCAGGCCTCTCAGGTAGGACAACAGCTCT…
C158R045	Unknown(898bp)	none of interest	0.93	Contig_2	0.94	repetitive	gggGCAGTAGATTGCAACACTGCCCCCTTTGACAGTCCATTCTTGTCTGAAAATGTTGTAGTTTGGGATGAAAATTTCAGAATTTTTGGTGGTCTTCCTAAGCCAGGATTCAGACACAGTTAAATCATTTGGGTTGGCAGAGTGTGCTAAAGCAGTGAATATAACAAACTTAGGGTGGAGGCTTCTAATGTTAACATGCATGAAACCAAGGCTATTACGGTTACAGAAGTCATCAAAAGAGAGCGCCTGGGGAATAGGAGTGGAGCTAGGCACTGCAGGGCCTGGATTCACCTCTACATCGCCAGAGGAACGGAGGAGGAGTAGGATAAGGGTACGGCTAAAAGTAATAAGAATTGGACGTCTGGAACAGAGAGTAAAAGGAGGTTTCTGGGGGTGATA…
C145R017	Unknown(2015bp)	scaffold of interest relatively low on list		Contig_2	0.95	repetitive	ATAAACAGTAGCTATAAAAAGTGAGTGAGTAGGCTGCATAGATTTCATGACTAGAAGCTCAAAAGACGAAAACGTCATTGTTGTTTTTTTTTTTTTGTAAATTGAAATTTGCTATCGTAAATGTTAGCAACACCTCCGCCTTTGCCGGATGCACGGGGGGTATGGTCACTAATGTAACCTGGGGGTGAGGCCTCATTTAACACAGTAAATTCATCAGGCTTAAGCCATGTTTCAGTCAGGCCAATCACATCAAGATTATTATCAGTGATTAGTTCATTGACTATAACTGCCTTGGAAGTGAGGGATCTAACATTAAGTAACCCAATTTTGAGATGTGAGGTATCACAATCTCTTTCAATAATGGCAGGAATGGAGGAGGTCTTTATACTAGTGAGATTG…
C129R097	Unknown(2739bp)	scaffold of interest relatively low on list		three with low scores	best is 83%	repetitive	cacaaacttggatagtaatacagaactctgcaggctatctttgcagtagattgcaacaccgccccctttggcagttctatCTTGGCGGAAAATGTTATAGTTAGCGATGGAGATTTCAGGGTTTTTGGTGGTTTTCCTAAGCCAGGATTTAGACACGGCTAAGACATCCGGGTTGGCAGAGTGTGCTAAAGCAGTGAGTAAAACAAACGTAGGGAGTAGGCTTTTAATGTTAACATGCATGAAACCAAGGCTTTTACGGTTACAGAAGTCAACAAATGAGAGCACCTGGGGAGTGGGAATGTAGCTAGGCACTGCAGGACCTGGATTAACCTCTACATCACCAGAGCAACAGAGGACAAGTAGGATAAGGGTCCTGTGCAGAGGGGAGAACAGGGATAC…
C042R109	Unknown(339bp)	scaffold of interest relatively low on list		Contig_28	0.82	ribosomal	AAAAGTTGTCAAAAAAGATCCGTAACTTTGGGATAAGGATTGGCTCTAAGGGCTGGGTCGGTCGAGCTGGGGTGCAAAGTGGGGCTGGACTCGAACCGCGGCTGGGGGAGCAGTCCCTCCGTCACCCTCCTCTCACCACCATTTCATTGTGTGGCCCATCTCGCGGTCTCTTGTGCGTGGTCTCGCAAGGGTCTGCGTGCGGGGATCCGTTGGGGTGGTGTCCGTCGGCGGACCGGTGGGGGGGGTTGGGTCCGGCGATTGGTGGCGGCAACTCTGGACGCGCGCCGGGCCCTTCTCGCGGATCTCTCCAACTATGGCGCTCGCCTGCCCCACGCATTG
C087R143	Unknown(2145bp)	scaffold of interest relatively low on list		Contig_2	0.94	only slightly repetitive but different versions	cgttccaggtcagccaaacgatactgagacgttcctagctgacatagaggacgcgttgggtggctacccggacgctacggTTTCTGACAGGGTTTACCTGTTGAAGCGAACGTCGAATAGACACGTGACGAGGTTCATTCGTCTACAACAGCAACACGTGCTAAATGACTATGCTAAACTTGCCACAGCTTTGAAATTAGAATTCAGTGGTTCTGCGACTCGCAAACACGATAGCTCACTGGCTAACACCGTCAAACAAGCTCGGAACGAACACCCACAAGCTTTCTATCATAGGCTTCGTTCAGCTTACTTTGGCCTACTCACAGAAACAGGAATGGAAGAGCTGTTACCATTCAAACAAATGTTTCTGTCGAACATGTATCCCACCTTCATTACCTA…
C236R089	Zinc finger protein 706	scaffold of interest relatively low on list		three with low scores	best is 80%	repetitive	atgcacaaaaagctCATTTGTCTCATTTTATTGCACAAATTTGTTTACATCCCTGTTAGTGAGCATTTCTCTGTCAAGATAATCCATCCACCTGACAGGTGCGCCATATCAAGAAGCTGATTAAACAGCATGATCATTACACAGGTGCACCTTTTGCTGGGGACAAAAGGCCACTAAAATGTGCAGTTTTGTCACAACACAATGCCACAGATGTCTGAAGGAGCATGCAAATATGTATGCAGGAATGTCCACCAGAGCTGCTGCCAAAGAATTTAATGTTCATTTCTCTACCATAAGTCACATTCATTTTAGAGAATTTGGCAGTACGTCCAACCGGCCTCAACCGCAGACCATGTGTAACCACGCCAGCCCTCCACATCTGGCTTCTTCACCTGTTAG…
C234R097	Unknown(1671bps)	none of interest		several with low scores	0.83	small portion repetitive	cgctggggCAGAAATGTCTTCAGGGAATTGATAAGGGGATAAATTACCAACAAATATTGTATGAATGGCAAACTTTTTGCTGTAGAGCGAGATAGAGAGCAGATATTCCTGTGATGTCTGCAAGTGAGATTTCTGTGACTTTTTAAAGTCAATACAATGTGTGATTTGTGACTTACAAGTTTTCCACTCAATGTTATTTGTATTGTTATTATTAATAATAGAATACATGGGACATAAAAAGGTTCTAACACCCTAAAAAGGTTATTTGAGGAACCTGTTTAAAAGGTTCCTCAGGGAAAGGTTCCTGGAAGTACCTTTGGTGGTTCCACCGGTGTGGCAATCTGAGGAAGTCATAAAGGTGTCTCCATGAACCTTTTTATTTTAGAGTGGGTGTACCTC…
C074R073	UNKNOWN	MMSRT100C/084G	0.95	n/a	n/a	Base Pairs 1-300 repetetive. Some Homology to uncharacterized protein LOC100191015 [Danio rerio] NP_001129460	gggggctaagatgacgccgaagagcatggctgacattttacatgcccgtaaccaattgtgctattctgttagtttttttgCATTGTTTGTAACGTAGTTTTTTAAACTTATTTTGAACATAATGTTGCTGCTACTGTCTCTTATGACCGAAAATAACTTCTGGAGATCAGAACTGGGATTACATACCACGAACTGGAAGAAGCTTTTTCCTTTAACGAGTCTGACAAGAAAGATATACTGCTCTCCCGGGAACAGGCTCAGATCCTCGTCATTTGCGTGAAGAAAAGACAGAGGAAAAGAGGATGCAGATCAGGCTACCTTTTGAGAATCCGTAGAGTCGTGGCTGAACGACGACAGGGATAATATAGAGCTGGAAGGATTTTCAATGCACCGGCAGAA…
C119R146	UNKNOWN	MMSRT092E/059D/103G	97% highest	Contig_28	0.97	ribosomal	ggggTATGTCAGACAGTCATAATCAGTCATTTAATGTTAATGACAGGATATAATATGTCCCCAGGATTATGAAAAGAGAGACAACACTTTCCCAGGGGCAATGGAGAAAACGAACAGGGACCTTATCGATCTCATCGCTCAATTCCCACATCTACACCTGTGTGGTGGAGATGAGGAGATGGGCTGGATTGATCAAGAAATGGGAGTGACCTGCTGCCAAGAAGAGGAGCACAATGAGGAAATGGACTGGATCTCATCAAGCAATCCAAATTTCTGCGTCTGGAGAGAAAGAGAAGATGAAGATGATGAAGCCTAAACGGTGTCAACTGGATGGATTGTCATCAAAACATCTTTGCATTAAGGCCAGGAAATTGGTGCACAACGCAGCTGCATTTTGCA…
C215R018	CREB-regulated transcription coactivator 2	MMSRT069D	0.96	Contig_107, Contig_98	94%-100%		CTCCTCCCTGAGTGGCCAGTCCCTCCACACCGCATCCAGTAACCCTAGTTACAATAGCGGGGTGGGAGGGTCCGGCTCGTGCTCCTCTTATTCGCCACTGCTAACTAGCCAGGGGCAGTCGCCTCTCAGCACGTTGCCACGGAGACGAGCTCAGCTCTCCCCTCTGATCCTACCCATGGGAGGGGAGTCTCGCCGACACCACTCCAAACAGTTCTCCCCCACCATCTCTCCTAACTTGTCCTCCATAACACAGGGTGTCCCTCTGGACACCAGCAAACTCCCCATGGACCAGAGGCTCCCTCCCTACCCCCTTCAGCCAACCCCAGCAGCAGCTTCATCAGCCAGGTCCTCCAGCATCCCATCAGCCCCAGCAGGCCTCTCAGGTAGGACAACAGCTCT…
C070R030	DENN domain-containing protein 4B	MMSRT069D	0.95	Contig_153, Contig_174	85%, 97%		GGACACACTGACCCCTGACACAGACTACTGGCCCCCCCTCTACATCCTGTGGAGGATACACAGTGGCGTACCCATGCGGAACCACAGCTGGCGGAGGCACAACCACCCCTTCACCCTGGCCTTCCTGGAGGAAGTGCTGCGCTGGGTCGGCATGAACGAGGTACACAAGGGAATCACTCTCTTCCTGGAAACCATTGCCAAGCAACCAGGCACACCCAAGATACAAAGGAGTCTGTACAGAGAGATGCTCTTCCTCACGCTGGCTGCCATGGGTAGAGATCACGTTGCTGCGTTTGATAAGAAATACAAGGCTGCGTACCAACGGCTGAGTGGCTCCTTGGGCCGCGAGGAGCTCCGCAGGAAGCGAGCCCAGCCCCCTAGCCCCAAGGCTGTGGACTG…
C125R083	UNKNOWN	none of interest	96% highest	Contig_28	0.98	repetitive	TTGCGACAATGGCGGCGGATAGTTTCAGGAATAGAGGGTCCAGATTGTCAAGCCCAGCTGATTTGTACGGGTCCAGGTTTTGCAGCTCTTTCAGAACATCTGCTGTTTGGATTTGGATTTGGGTAAAGGAGAACCTGGAGAGGCTTGGGCGAGTAGCTGCGGGGGGGGGGGAGCTGTTGGACGAGGTTGGAGTAGCCAGGCGGAAGGCATGGCCAGCCGTTGAGAAATGCTTGTTGAAGTTTTCGATAATCATGGATTTATCGGTGGTGACCGTGTTACCTAGCCTCAGTGCAGTGGGCAGCTGGGAGGAGGTGCTCTTGTTCTCCATGGACTTCACAGTGTCCCAGAACTTTTTGGAGTTGGAGCTACAAGATGCAAACTTCTGCCTGAAGAAGTTGG…
C265R056/C082R060	Calcium-binding protein P	scaffold of interest relatively low on list		Contig_51, Contig_28	0.86	repetitive within trout draft genome	CCACCACACGACCAGCTGACATCCAAGCAGACCCAGCATCTTCCCACCTGGAAGTTGTGGACATCACCCCCAAAACAGAGGCAGACCCGGCTTGTTCCCACCTGGAGGTTGTGGACATCACCCCAAAAACAGAGGCAGACCCGGCTTGTTCCCACCTGGAGGTTGTGAACATCACCCCTAACACAGAGGCAGACCCGGCTTGTTCCCACCTGGAGGTTGTGAACATCACCCCTAACACAGAGGCAGACCCGGGTTGTTCCCAACTAGATATTGTGGACATCACCCCAAAAACAGAGGCAGACCCGGGTTGTTCCCACCTGGAGGTTGTGGATATCACCCCTAAAACAGAGGCAGACCCGGCATCTTCCCACCTGGAGGTTCAAGACATTACCCCAAAAA…
C150R126	Integumentary mucin A.1 precursor	none of interest		Contig_28	0.99	repetitive within trout draft genome	CGACCAGACTCTTCCAGATCTGCCAGTCGACCAGACTCTTCCAGATCTGCCAGTCGACCAGACTCTTCCAGATCTGCCCGTCGTCCAGACTCTTCCAGATCTGCCAGTCGTCCAGACTCTTCCAGATCTGCCAGTCGTCCAGACTCTTCCAGATCTGCCAGTCGACCAGACTCTTCCAGATCTGCCAGTCGACCAGACTCTTCCAGATCTGCCAGTCGACCAGACTCTTCCAGATCTGCCAGTCGACCAGACTCTTCCAGATCTGCCAGTCGACCAGACTCTTCCAGATCTGCCAGTCGACCAGACTCTTCCAGATCTGCCAGTCGACC
C220R056	Transposable element Tc1 transposase			Contig_2, Contig_21	94%, 92%	TE	GGGGATATCCACATAATTTTCTTTCCTCATGATGCAATCTATTTTGTGAAGTGCACCAGTCCCTCCTGCAGCAAAGAACCTCCACAAAATGATGCTGCCACCCCCGTGCTTCAAGGTTGGGATGGTGTTCTTCGGCTTGCAAGCCTCTCCCTTTTTCCTCCAAACATAACAATGGTCATTATTGCTAAACAGTTCTATTTTTGTTTCATCAGACCAGAGGACATTTCTCCAAAAAGTACAATCTTGTCATGGCTGTTTGAAGGATCGGACCAAAATGCAGCGTGTTCGTAATTCCACATATTTATTTATTCCGTGAAACTAAATGCAATACATACATTTACTTGAAACACAAAAAAACAACAAACCGTGACGCAGAGAGGAAAACACACTACTCAAAAG…
C174R030/C014R165	Transposable element Tc1 transposase			Contig_2, Contig_21	96%, 96%	TE	CAAACTCTCTCCAGAAGTTCAGTGAGGATCTCTGAATGATCCAATGTTGACCTAAATGACTAATGATGATAAATAGAATCCACCTGTGTGTAATAAAGTCTCCGTATAAATGCACCTGCTCTGTGATAGTCTCAGAGGTCCGTTTAAAGCGCAGAGAGCATCATGAAGAACAAGGAACACACCAGGCAGGTCCGAGATACTGTTGTGGAGAAGTTTAAAGCCGGATTTGGATACAAAAAGATTTCCCAAGCTTTAAACATCCCAAGGAGCACTGTGCAAGTGATAATATTGAAATGGAAGGAGTATCAGACCACTGCAAATCTACGAAGACCCGGCCGTCCCTCTAAACTTTCAGCTCATACAAGGAGAAGACTGATCAGAGATGCAGCCAAGAGGCCC…
C109R084	Transposable element Tc1 transposase			Contig_2, Contig_21	97%, 96%	TE	aAGAAAagcAggccCaAACCATGaTGCtgccaccaCCAtatttgACAGTGGGGATGGTGTGTTCAGGGTGATGAGCtGTGTTGCTTTTACGCCAAACATAACGTTTTGCATTGTTGCCAAAAAGTTTGATTTTGGTTTCATCTGACCAGAGCACCTTCTTCCACATGTTTGTTGTGTCTCCCAGGTGGCTAGTGGCAAACTTTAAACAACACTTTTTATGGATATCTTTAAGAAATGGCTTTCTTCTTGCCACTCTTCCATAAAGGCCAGATTTGTGCAGTATACGACTGATTGTTGTCCTATGGACAGAGTCTCCCACCTCAGCTGTAGATCTCTGCAGTTCATCCAGAGTGATCATGGGCCTCTTGGCTGCATCTCTGATCAGTCTTCTCCTTGTAT…
C083R008	Transposable element Tc1 transposase			Contig_2, Contig_21	0.94	TE	aaatggaaagaaatttattggatatttcaaacttcttttAACAAACAAAccgAAAAATTGGCcgtgccaAATGAccccccCCccttaCTtTcagtgcagcAaAcTCccccgaagtTcagTGAGAATccctgAATGATCccaTGTTGACccaAATGACTAATTATGATAAATAGAATCCccccgTGTGTAATCAAGTctccgtATAAATGCccccgccctgtgATAGTctcagaggtccgtTtAccgcccagagaGcctcctGAAGAACAAGGAAcccacccggcaggtcccAAATACTGTTGTGGAGAAGTTAAAAGCccGATTTGGATAcaaAAAGATTTCCccaGcTTTAAAcATCCcaaGgAgcacTgTGCAaGcgaTAATATTGAAATGGAAGGA…
C037R135/C030R110	Transposable element Tc1 transposase			Contig_21 and others	0.99	TE	agaggatgaggtaaatcaaaccaaaacaagctacttgaaggttgaagcacatccccaacacccagacagacaccaggtgcTACAGAGGCAGAATATTCCAAGAACCTCCACAGCCATCTGACCACCTACCTGCGATCTCTCCACAGCACAGAGAAGTGAGTCTGCTGGGCTGTGGAACTCTAGAGCAGCACATCAACGAACCTGCCACCCTGTCAGCAGACAGTTCCCAGAGGAAGGATGCAACTATCAAGGCTGTAAATGGTCACATTTGGGGGATGACCACCAAATGCAATAAAGTTTTGTATAAACTACTCATGTTTTTATTTTACTTTAATAGGTTACAAAACATAACTTTTTCATGGCCTGTTGGTCTTTTCATTTTTACTAAACGACTAAGAT…
C137R053/C112R062	Transposable element Tcb1 transposase			Contig_2	0.87	TE	ttggtgctgaccaagtataaccacaccagcccaggatttccacttctggcttcttcacctgcagaattatctgagaccagCCACCCAGACATATGATGAAACAGAGGAGTATTTATGTCTGTAATAAAGCCCTTTTGTGGGGGAAAAACTCATTCTGATTGGCTGGGCCTGGCTCCCCAGTGGGTGTCCCTATGCCCTCCCAGGCCCAACCATGGCTGCGCCCCTTCCCAGTCATGTAAAATCCATAGATTAGGGCCTAATGAATTTTATTTATATTGACTGATTCCCTTATATGAACTGTAACTCAGTACAATCGTTGAAATTGTTGCATGTTGTGTTTTTATATTTTTGTTCAGTATATTTACACTACTTTGCATTTGTCTGGGCTTGTTAGCAGTA…
C109R093	Transposable element Tcb1 transposase			Contig_2	0.9	TE	gggggagttccaaagaaacagatggtcgtagaccttttataaatctgttaatggctaccagaagatccacaaacgattgaATATATGACTGAGcAcTgTcAGGGCGATTATTAAAAAATTTAAAAGATATGGAACAgTTGAAAACCTcacGGGTAGAGGACGCAAATGCATTTTGCCCCCCAGGATAGGGGGGAGGATCGTGAGAGAAGCAACAAAATCCCAAAGAATCACTGTGAAAGAATTCCAGGCCTTGGTGGCATCTTGGGGTCACCAGGTTTCAAAAAGCACCATCAGACGCCACCTCTACAACCATAGACTCTTTGGAAGGGTTGCCAGAAGAAAGCCCTTAATGACCCCAAGACACAGGCACCTCATACCCACGGTGAAATATGGTGGTGG…
C042R032	Transposable element Tcb1 transposase			Contig_2	0.83	TE	catttagaagcttttattttcatatttaccaatgtaaaacatacactatatatacaaaagtatgGTGGATTCGGCTATTTCAGCCACACCTGTTGCTGGCAGGTGTATACAAATCGAGCACACAGCCATGCAATCACTATAGACAAACATTGCAGTAGAATGGCCTTACTGAAGAGCTCAGTGACTTTCAATCGCACCTTCATAGGAAGCCACCTTTCCAACAAGTCAGTTGGTTAAATTTCTGCCCTGCTAGACCTGCCCCAGTCAACTATAAGTGCTGTTATTGTGAAGTGGAAACATCTAGGAGCAACAAGGCTCAGCCTCAAAGGGATAGGCCACACAAGCTCACAGAACGGGACCGCCGAATGCTGTAGCGCATAAAAATTGTCTGTCCTAGGG…
C020R105	Transposable element Tcb2 transposase			Contig_28 and others	0.93	TE	tgcactgtggagctacaacaaagcatttcgctacacccacaataacatctgctaaacacgtgtatatgacaaataatttgATTTGAAAAACTTCCATTTCAAATTTCCACTCGGGCAGCCCTGAGAACCAATAACTGAGCATGCATAAAGCACTTAGCTTGAGACTGTTTTCTTTAAGCAGATAACATTATAATGCAGTTTAAACCACCTCTGTGCGAATGTATGTAATGTGCTCCAGTGTGCCCAAAGTCATTTTCCAGTGCGTTGTCTCCATGTCTCCATTCTTGATGTGAATCAGTTCTAGCGTATTAATATGTTTTATGGAAATAGGGTTGGAAATAGGTGTTTCCCTAATGACAATCTAAAGAGCCTAACTACAACTGGTAAAAATGTGTCACA…
C017R059	Transposable element Tcb2 transposase			Contig_28 and others	0.93	TE	cgatctgataaatatgtatttattaaacgtctacatatgtacattctcagagattaaggcatttaagttaattgtaAAAATATATACTGCTCAAAAAAATAAAGGGAACACCAAAACAACACATCCTAGATCTGAATGAATGAAATAATCTTATTAAATACTTTTTTGTTTACATAGTTGAATGCGCTGACAACAAAATCACACAAGAATAATCAATGGAAATCCAATTTATCAACCCATGGAGGTCTGGATTTGGAGTCACAATCAAAATTAAAGTGGAAAACCACACTACAGGCTGATCCAACTTTGATATAATGTCCTTAAAACAAGTCAAAATGAGGCTCAGTAGTGTGTGTGGCCTCCACGTGCCTGTATGACCTCCCTACAATGCCTGGGCAT…
C061R024	Transposable element Tcb2 transposase			Contig_21 and others	0.96	TE	ggggCTGCTCAAACGGTCAGAAACAGACTCTATGAGGGTGGTATGAGGGCCCAACGTCCACAGGTGGGGGTTGTGCTTACAGCCCGACACCGTGCAGGACGTTTGGCATTTGCCAGAGAACACCAAGATTGGCAAATTCGCCACTGGCACCCTGTGCTCTTCACAGATGAAAGCAGGTTCACACTGAGCACGTGACAGATGTGACAGAGTCTGGAGACGCCGTGGAGAACGTTTTGCTGCCTGCAACATCCTCCAGCATGACCGGTTTGGCGGTGGGTCAGTCATGGTGTGGGGTGGCATTTCTTTGGGGGGCCGCACAACCCCCCTTGTGCTCGCCAGAGGTAGCCTGACTGCCATTAGGTACCGAGATGAGATCCTCAGACCCCTTGTGAGACCATA…
C265R135	Probable RNA-directed DNA polymerase from transposon BS			Contig_2, others with lower homology	0.94	TE	ccaaacagttatatttttggttcatcagaccagaggacatttctccaaaaagtacgctctttgtccccatgtgcatttgcAAATCGTAGTCTGGCTTTTTTATGGCGGTTTTGGAGCAGTGGCTTCTTCCTTGCTGAGCAGCCTTTCAGGTTATGTCGATATAGGACTCGTTTTACTGTTTCCTCCAGCATCTTCACAAGGTCTGTGAAGATGAAAATCTGGACCCCTACAAATCAGCCGGGCTAGACAATCTGTACCCTTTCTTTCTAAAATTATCTGCTGAAATTGTTGCAACCCCTATTACTAGCCTGTTCAACCTCTCTTTCGTGTCGTCTGAGATTCCTAAAGATTGGAAAGCAGCTGCTGTCATCCCCCTCTTCAAAGGAGGGGACACTCTTA…
C079R126	Probable RNA-directed DNA polymerase from transposon BS			Contig_2	0.94	TE	ggggattgaaagtcagccttcgatcCAAGCCCATGTAATGCTTTGTAGGTTAGCAGTAAAACCTTGAAATCAGCCCTTGCCTTAACAGGAAGCCAGTGTAGGGAGGCTAGTACTGGAGTAATATGATCAAATTTTTTGGTTCTAGTCAGGATTCTAGCAGCCGTATTTAGCACTAACTGAAGTTTATTTAGTGCTTTATCCGGGTAGCCGGAAAGTAGAGCATTGCAGTAGTCCAGCCTAGAAGTAACAAAAGCATGGATTAATTTTTCTGCGTCATTTTTGGACAGAAAATTTCGGATTTTTGCAATGTTACGTAGATGGAAAAAAGCTGTCCTTGAAACAGTCTTGATATGTTCTTCAAAAGAGAGATCAGGGTCCAGAGTAACGCCGAGGTCCTTC…
C139R143	Retrotransposon-derived protein PEG10			Contig_2	0.86	TE	CCTACCACCACTCCTAGCATTCGTGACAGAATCCCGCACCTGATTATGGAGTCAGCAGGAGCAGCCGCACCTCCTCTCCCATCGATGGAGGAAAGGGTCCTCCATCATACCAGCATTCTCCACCGGATCGGTTCAGCTATGGATCAGATGATGGAGTGGATGGACCGATGGGAGAGGAGTGGCCTCCCTACTGCATCTCCAGCTCCTCTTCCCCCTCCACCTGCTACCCCTCCTCCAGCGTCCGGACCCGGGGCCCTACGCCTGGCTCTCCCCAGGGAGTACGATGGAGCGGCGGCTGGGTGCCAGGGGTTCCTGCTGCAGCTGGAGTTGTACCTGGCTACCGTTCGTCCGTCTCCTGCTTAACGGGTCGTGCCCTGGAGTGGGCCAACGCAGTGTGGT…
C126R117	RNA-directed DNA polymerase from mobile element jockey			Contig_28	0.83	TE	GTTTGCTGAGTAGAGTGTTTGTTGGCTATTTTGTAAATGACCGCTGAAGTCGAGGATCTGTAGGATAGTCAGTTTTACGAGGGTATGTTTGGCAGGTTGAGTAAAGGAGGCCGATTTCTAGATTTTATTTTGGATTGGAGATGTTTAATATGAGTCTGGAAGGAGAGTTTACGCTCTAGCCAGACACCTAGGTATTTGTAGTTGTCAACATATTCTAAGTCAGAACCGTCCAGAGTAGTGATGCTAGTCGGGTGGGCGTGTGCAAGCAGCGAACGGTTGAAAAGCATGCACTTAGTTTTACGAGCGTTTAAGAGCAGTTAGAGGCCACGGAAGGAGTGTTCTATGACATTGAAGCTCATTTGGAGGTCCAAAGAAGGGCCAAATGTATACAGAATGGTG…
C013R008	RNA-directed DNA polymerase from mobile element jockey			Contig_28 and others	0.88	TE	cacGGGTGCACCACAGCCACGCTCAAGGTCCTAAACGATATCATAACCGCCATCGATAAAAGACAGTACTGTGCAGCCGTCGTCATCGACCTGGCCAAGGCTTTCGACTCTGTCAATCACCGTACTCTTATCGGCAGACTCAACAGCCTTGGTTTCTCTAATGACTGCCTCACCTGGCTCACCAACTACTTCTCAGACAGAGTTCATTATGTCAAATCAGAGGGCCTGTTGTCTGGACCTCTGGCAGTCTATATGGGGGTGCCACAGGGTGCAATTCTCGGGTCGACTCTCTTCTCTGTGTACATCAATGATGTCGCTCTTGCTGCTGGTGAGTCTCTGATCCACCTCTAAGCAGACGACACCATTCTGTATACTTCTGGCCCTTCTTTGGACACTGTG…
C080R125	Retrotransposable element Tf2 155 kDa protein type 3			Contig_2, Contig_21	88%, 85%	TE	CACCTGCCCAGAGGGAAGTTACAACCCCTACCCATTCCGCAACGGCCGTGGTCGCACCTGTCGGTGGACTTCCTGACTGATCTTCCTCCCTCACAGGGCAACACCACGATCCTGGTCGTTGTGGATCGGTTTTCTAAGTCCTGCCATCTCCTCCCTTTGCCCGGTCTCCCTACGGCCTTACAGACTGCGGAGGTCCTGTTCACTCACGTCTTCCAGCACTACTGGGTGCCTGAGGACATAGTCTCTGATCGGGGTCCCCAGTTCACGTCCAGGGTATGGAGGGCGTTCATGGAACGTCTGGGGGTCTCGGTCAGCCTCACCTCAGGTTTTCACCCTGAGAGTAACGGGCAGGTGGAGAGAGTAAACCAGGATGTGGGTAGGTTTCTGCGGTCATATTGC…
